# Supplementary material for: Ankrd11 deficiency reverses the dysfunction of chronic HBV-specific T-cell
Source: Research Square preprint supplement (doi:10.21203/rs.3.rs-6785364/v1), 2025-06-16
Supplement: Supplementary file 1 [file 4ecd8e25ca024777beb82ac8.docx]

**Extended Data Fig. 1 Surface Expression Validation of Single-Cell-Derived HBc141-151-Specific TCR**

a, Experimental design schematic of single-cell nested multiplex PCR and TCR sequencing. b, VDJ Profiling of αβ TCR Clones via single-cell Sequencing. c, Flow cytometry analysis of TCR Vβ10 expression and HBc141-151/HLA-A11 tetramer staining in Jurkat cells 24 hours post-TCR gene electroporation.

**Extended Data Fig. 2 Ankrd11 Deficiency Enhances Proliferation and Low IL-2 Resistance in CD8⁺ T Cells *in Vitro***

a,c, Flow cytometry analysis of CTV dilution and ki67 expression in HB-I and HB-I Ankrd11 cKO CD8⁺ T cells after HBc141-151 peptide activation. n=4/group. c, Flow cytometry analysis of Ki67 expression in HB-I and HB-I Ankrd11 cKO CD8⁺ T cells after three days of activation with HBc141-151. n=4/group. b, Flow cytometry analysis of intracellular IFNγ and TNFα expression in WT and cKO CD8⁺ T cells stimulated for 72 h with anti-CD3/CD28 antibodies under low IL-2 conditions (20 U/mL). n=5/group. Each symbol represents an individual sample. two-tailed unpaired t test was performed. Data are shown as the mean ± SD.
